# Supplementary material for: Valorization of Prosopis juliflora Woody Biomass in Northeast Brazilian through Dry Torrefaction
Source: MDPI journal article supplement (doi:10.3390/en14123465), 2021-06-11
Supplement: s1 [file s1]

# Valorization of *Prosopis juliflora* Woody Biomass in Northeast Brazilian through Dry Torrefaction

José Airton de Mattos Carneiro-Junior <sup>1</sup>, Giulyane Felix de Oliveira <sup>2</sup>, Carine Tondo Alves <sup>3</sup>, Heloysa Martins Carvalho Andrade <sup>2,4</sup>, Silvio Alexandre Beisl Vieira de Melo <sup>4,5</sup> and Ednildo Andrade Torres <sup>4,5,\*</sup>

<sup>1</sup> Department of Biofuels, Federal Institute of Education, Science and Technology of Bahia, 44.900-000 Irecê-BA, Brazil; airton@ifba.edu.br

<sup>2</sup> Department of Inorganic Chemistry, Federal University of Bahia, 40.170-115 Salvador-BA, Brazil; giulyanefelix@hotmail.com (G.F.d.O.); handrade@ufba.br (H.M.C.A.)

<sup>3</sup> Department of Energy Engineering, Federal University of the Reconcavo of Bahia, 44085-132 Feira de Santana-BA, Brazil; carine.alves@ufrb.edu.br

<sup>4</sup> Interdisciplinary Center in Energy and Environment, Federal University of Bahia, 40.170-115 Salvador-BA, Brazil; sabvm@ufba.br

<sup>5</sup> Industrial Engineering Program, Federal University of Bahia, 40210-630 Salvador-BA, Brazil; sabvm@ufba.br

\* Correspondence: ednildotorres@gmail.com

## Supplementary Materials

**Table S1.** Physicochemical characterization of biomass.

| Biomass                        | Proximate analysis     |                 |                  |                 | Ultimate analysis <sup>b</sup> |         |          |           |           |                  |
|--------------------------------|------------------------|-----------------|------------------|-----------------|--------------------------------|---------|----------|-----------|-----------|------------------|
|                                | MC <sup>a</sup>        | VM <sup>b</sup> | Ash <sup>b</sup> | FC <sup>b</sup> | C                              | H       | N        | O         | S         | HHV <sup>c</sup> |
| PJ105                          | 6.1 ± 0.2              | 78.68 ± 0.7     | 2.87 ± 0.13      | 12.35 ± 0.5     | 46.30                          | 7.49    | 0.25     | 42.99     | 0.10      | 18.33 ± 0.10     |
| PJ230                          | 0.3 ± 0.02             | 74.92 ± 0.6     | 3.25 ± 0.05      | 21.53 ± 0.2     | 53.84                          | 6.45    | 0.24     | 36.21     | 0.01      | 20.01 ± 0.08     |
| PJ270                          | 0.1 ± 0.03             | 72.64 ± 0.4     | 3.97 ± 0.03      | 23.29 ± 0.2     | 61.24                          | 5.64    | 0.10     | 29.04     | <0.01     | 21.14 ± 0.10     |
| PJ310                          | 0.0 ± 0.03             | 67.93 ± 0.4     | 4.41 ± 0.03      | 27.66 ± 0.1     | 63.65                          | 5.23    | 0.08     | 26.62     | <0.01     | 23.05 ± 0.06     |
| <i>Prosopis</i> <sup>1</sup>   | 7.9–12.0               | 62.7–77.5       | 0.5–4.6          | 16.8–24.8       | 43.3–48.5                      | 5.9–8.1 | 1.4–1.9  | 42.5–48.0 | 0.06–0.18 | 16.8–21.4        |
| <i>Eucalyptus</i> <sup>2</sup> | 2.3–11.6               | 63.4–84.2       | 0.4–6.1          | 13.9–24.5       | 41.4–47.2                      | 5.0–8.1 | 0.02–1.6 | 44.9–51.9 | 0.06–0.5  | 13.2–18.7        |
| <i>Pinus</i> <sup>3</sup>      | 2.4–7.6                | 78.3–87.8       | 0.2–4.4          | 11.8–12.7       | 47.3–47.9                      | 5.7–6.5 | 0.1–0.2  | 42.3–44.9 | 0.03–0.5  | 19.4–20.0        |
| Peat <sup>4</sup>              | 10.0–55.0 <sup>a</sup> | 50.0–80.0       | 2.0–7.0          | 4.0–30.0        | 52.0–56.0                      | 5.0–6.5 | 0.8–3.0  | 30–40     | 0.05–0.3  | 17.3–26.3        |
| Coal <sup>4</sup>              | 6.0–10.0 <sup>a</sup>  | 15.0–45.0       | 3.0–12.0         | 45.0–85.0       | 46.0–87.0                      | 3.5–5.0 | 0.8–1.5  | 2.8–11.3  | 0.7–4.0   | 24.4–32.6        |

Note: M: Moisture; VM: Volatile Material; FC: Fixed Carbon; HHV: Higher Heating Value.

<sup>a</sup> (weight %, dry basis); <sup>b</sup> (weight %); <sup>c</sup> (MJ/kg).

<sup>1</sup> Ranges derived from comparison of wood/wood material properties reported in different studies with the wet and dry biomass [18,22,38,39,41–43].

<sup>2</sup> It is composed with parts of the wood *E. globulus*, *E. grandis* and *E. nitens* (leaves, wood, bark) [4,8,14,65].

<sup>3</sup> It is composed with *Pinus sylvestris* reported in the studies by Sajdak, et al. [66]; Álvarez, Nogueiro, Pizarro, Matos and Bueno [4].

<sup>4</sup> Ranges derived from bituminous coal properties [6,52,67,68].

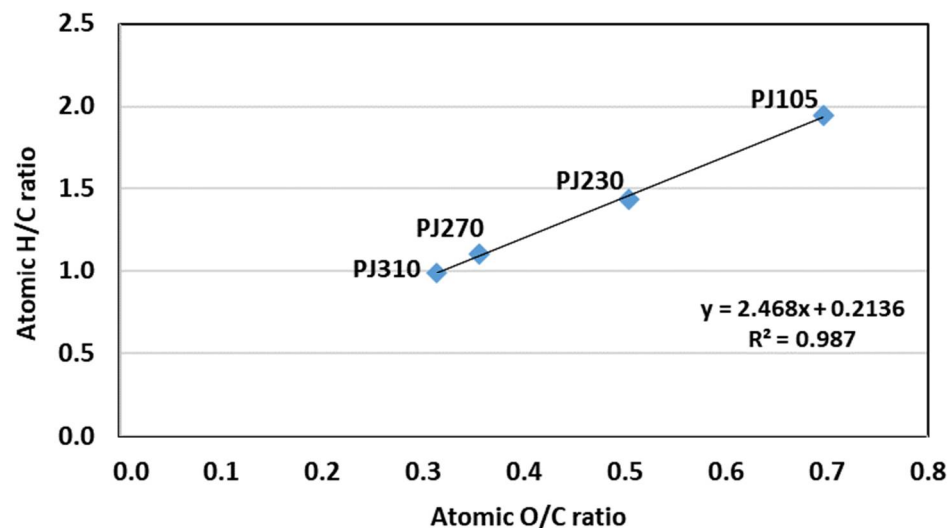

Figure S1. Van Krevelen diagram of the *P. juliflora* samples.

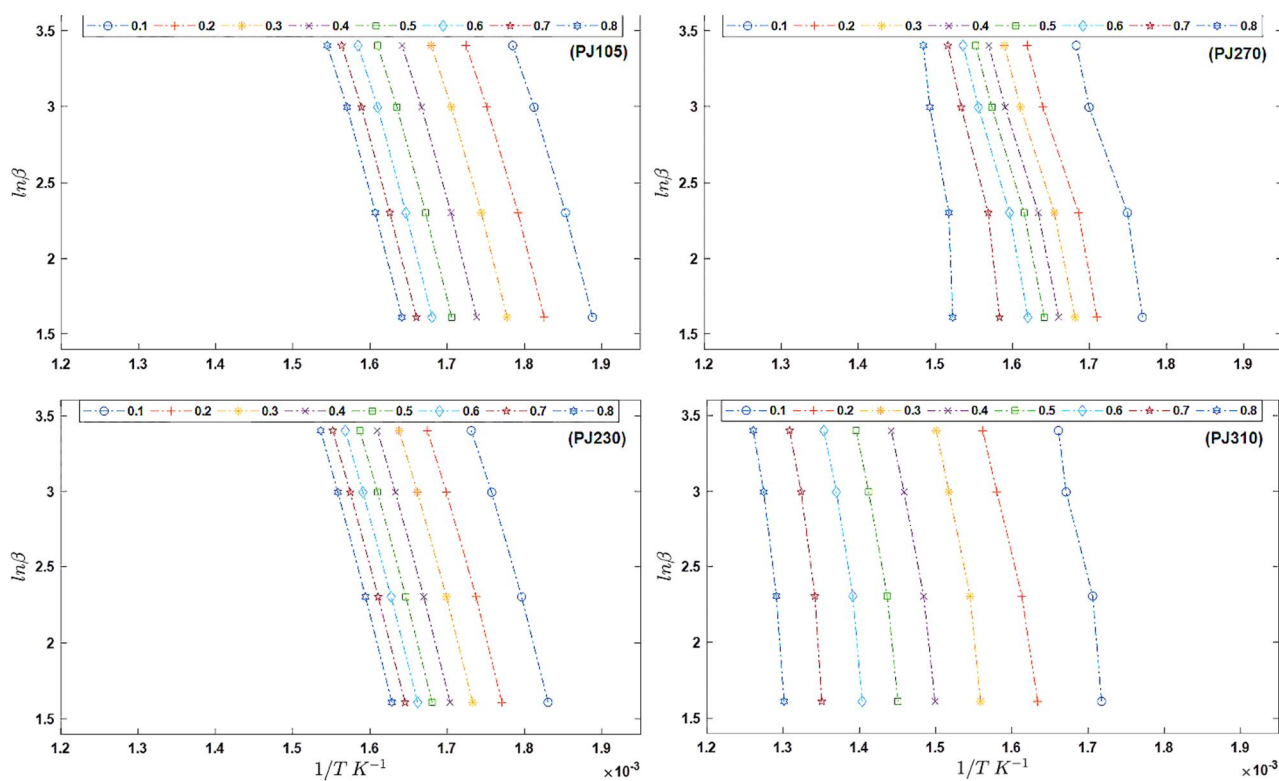

Figure S2. Estimation of activation energy using the FWO isoconversional method.

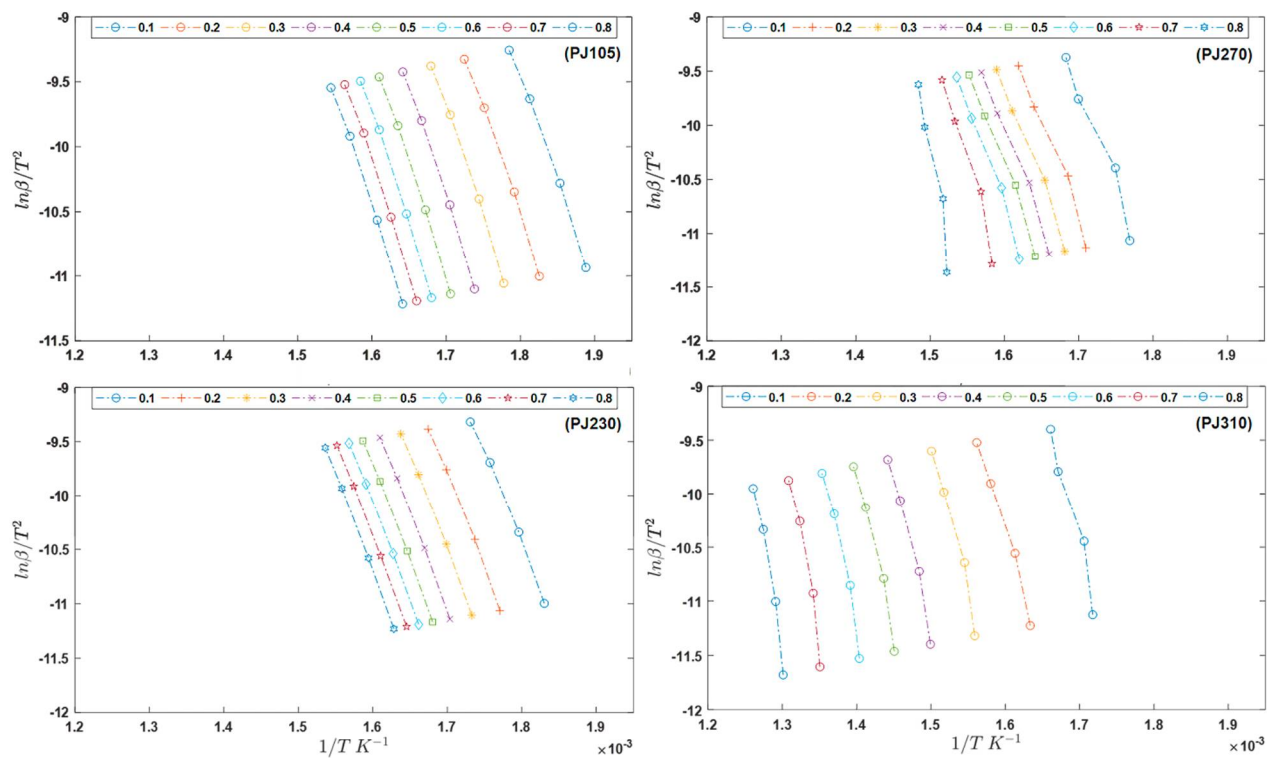

**Figure S3.** Estimation of activation energy using the KAS isoconversional method.
