# Supplementary material for: Valorization of Prosopis juliflora Woody Biomass in Northeast Brazilian through Dry Torrefaction
Source: MDPI journal article supplement (doi:10.3390/en14123465), 2021-06-11
Supplement: s1 [file s1]

Archive with 1 entries (1 files):
- energies-1225421-supplementary.pdf
